# Supplementary material
Source: MDPI journal article supplement (https://www.mdpi.com/2073-4344/9/3/231)
Supplement: s1 [file s1]

# Supplementary Information: Mechanism Analysis and Kinetic Modelling of Cu NPs Catalysed Glycerol Conversion into Lactic Acid

Sergey A. Zavrazhnov, Anton L. Esipovich, Sergey Yu. Zlobin, Artem S. Belousov and Andrey V. Vorotyntsev

## 1. Composition of the Gas Phase

**Table S1.** Composition of the gas phase in the course of glycerol conversion.

| Gas             | %Vol   |
|-----------------|--------|
| N <sub>2</sub>  | 4.152  |
| O <sub>2</sub>  | 0.462  |
| H <sub>2</sub>  | 95.112 |
| CH <sub>4</sub> | 0.009  |
| CO              | 0.032  |
| CO <sub>2</sub> | 0.004  |
| Total           | 99.771 |

## 2. Effect of Stirring Speed

### 2.1. Homogeneous Catalysis

**Table S2.** Effect of stirring speed on glycerol conversion in the presence of NaOH.

| rpm  | Conversion of glycerol (%) |
|------|----------------------------|
| 0    | 7.3                        |
| 400  | 9.1                        |
| 800  | 12.0                       |
| 1000 | 12.1                       |

Reaction conditions: NaOH as a catalyst, initial glycerol concentration of 0.92 mol·L<sup>-1</sup>, NaOH/glycerol molar ratio of 1.1:1, reaction temperature of 503 K.

### 2.2. Tandem Catalysis

**Table S3.** Effect of stirring speed on glycerol conversion in the presence of Cu NPs and NaOH.

| rpm  | Conversion of glycerol (%) |
|------|----------------------------|
| 0    | 43.7                       |
| 400  | 49.5                       |
| 800  | 88.6                       |
| 1000 | 89.0                       |

Reaction conditions: Cu NPs–NaOH as a catalyst, initial glycerol concentration of 0.92 mol·L<sup>-1</sup>, glycerol/Cu molar ratio of 25.4:1, NaOH/glycerol molar ratio of 1.1:1, reaction temperature of 513 K.

## 3. Evaluation of external and internal mass transfer

### 3.1. The Weisz-Prater Criterion

The Weisz-Prater criterion ( $C_{WP}$ ) is used to check whether the reaction is internal diffusion limited. The Weisz-Prater parameter was calculated by using the following equation:

$$C_{WP} = \frac{-r'_{GLY} \cdot \rho_s \cdot R^2}{D_e \cdot C_{AS}}. \quad (1)$$

The internal diffusion is negligible when  $C_{WP}$  is  $\ll 1$ . Effective diffusivity of glycerol into water:

$$D_e = \frac{D_{AB} \cdot \phi \cdot \sigma}{\tau}. \quad (2)$$

The parameters used in the above equation are given in Table S4:

**Table S4.** Parameters for calculating the Weisz–Prater criterion.

| Parameter   | Description                                          | Value                                                                                 |
|-------------|------------------------------------------------------|---------------------------------------------------------------------------------------|
| $-r'_{GLY}$ | observed reaction rate                               | $3.89 \cdot 10^{-4} \text{ mol} \cdot \text{g}_{\text{cat}}^{-1} \cdot \text{s}^{-1}$ |
| $\rho_s$    | solid catalyst density                               | $8.96 \text{ g} \cdot \text{cm}^{-3}$                                                 |
| $R$         | average catalyst particle radius                     | $1.17 \cdot 10^{-5} \text{ cm}$                                                       |
| $C_{AS}$    | concentration of glycerol at catalyst surface        | $1.1 \cdot 10^{-3} \text{ mol} \cdot \text{cm}^{-3}$                                  |
| $D_e$       | effective diffusivity of glycerol into water at 523K | $2.11 \cdot 10^{-5} \text{ cm}^2 \cdot \text{s}^{-1}$                                 |
| $\phi$      | catalyst porosity                                    | $0.4^1$                                                                               |
| $\sigma$    | constriction factor                                  | $0.8^1$                                                                               |
| $\tau$      | tortuosity                                           | $3.0^1$                                                                               |

<sup>1</sup> Typical value of porosity, constriction factor and tortuosity, respectively.

The average catalyst particle radius is  $1.17 \cdot 10^{-5} \text{ cm}$ , but for further calculations we will stick to the worst scenario and take the value of  $5 \cdot 10^{-5} \text{ cm}$ .

$D_{AB}$  is the diffusion coefficient of glycerol into water at 513 K (diffusivity of solute A into solvent B at 513 K).

The diffusion coefficient was calculated using the Wilke–Chang equation:

$$D_{AB} = \frac{1.173 \cdot 10^{-16} \cdot (\phi \cdot M_B)^{1/2} \cdot T}{\mu_B \cdot V_A^{0.6}}, \quad (3)$$

where  $\phi$  is the association parameter of water (2.26),  $M_B$  is the molecular weight of water ( $18 \text{ kg} \cdot \text{kmol}^{-1}$ ),  $T$  is the absolute temperature (513 K),  $\mu_B$  is the solution viscosity ( $1.11 \cdot 10^{-4} \text{ kg} \cdot \text{s}^{-1} \cdot \text{m}^{-1}$ ),  $V_A$  is the molar volume at the normal boiling point ( $0.0756 \text{ m}^3 \cdot \text{kmol}^{-1}$ ).

$$D_{AB} = \frac{1.173 \cdot 10^{-16} \cdot (2.26 \cdot 18)^{1/2} \cdot 513}{1.11 \cdot 10^{-4} \cdot 0.0756^{0.6}} = 1.63 \cdot 10^{-8} \text{ m}^2 \cdot \text{s}^{-1} = 1.63 \cdot 10^{-4} \text{ cm}^2 \cdot \text{s}^{-1}. \quad (4)$$

Effective diffusivity of glycerol into water at 513 K:

$$D_e = \frac{D_{AB} \cdot \phi \cdot \sigma}{\tau} = \frac{1.63 \cdot 10^{-4} \cdot 0.4 \cdot 0.8}{3.0} = 1.74 \cdot 10^{-5} \text{ cm}^2 \cdot \text{s}^{-1}. \quad (5)$$

$$C_{WP} = \frac{-r'_{GLY} \cdot \rho_s \cdot R^2}{D_e \cdot C_{AS}} = \frac{3.89 \cdot 10^{-4} \cdot 8.96 \cdot (5 \cdot 10^{-6})^2}{1.74 \cdot 10^{-5} \cdot 1.1 \cdot 10^{-3}} = 4.55 \cdot 10^{-4}. \quad (6)$$

The  $C_{WP}$  value of glycerol into water is equal to  $4.55 \cdot 10^{-4} \ll 1$  on substitution of the above values and from this we can infer that internal diffusion is negligible in the above reaction.

### 3.2. The Mears Criterion

Mears criterion is used to check whether the reaction is limited by external diffusion:

$$C_{mears} = \frac{-r'_{GLY} \cdot \rho_b \cdot R \cdot n}{k_c \cdot C_{AS}} < 0.15, \quad (7)$$

where  $-r'_{GLY}$  is the observed reaction rate ( $3.89 \cdot 10^{-4} \text{ mol} \cdot \text{g}_{\text{cat}}^{-1} \cdot \text{s}^{-1}$ ),  $n$  is the reaction order (2),  $R$  is the average catalyst particle radius ( $1.17 \cdot 10^{-5} \text{ cm}$ , the worst scenario for calculations  $- 5 \cdot 10^{-5} \text{ cm}$ ),  $\rho_b$  is the bulk density ( $0.35 \text{ g} \cdot \text{cm}^{-3}$ ),  $C_{AS}$  is the concentration of glycerol in solution ( $1.1 \cdot 10^{-3} \text{ mol} \cdot \text{cm}^{-3}$ ),  $k_c$  is the mass transfer coefficient for glycerol–water,  $\text{m} \cdot \text{s}^{-1}$ .

The mass transfer coefficient for glycerol–water is calculated as:

$$k_c = \frac{Sh \cdot D_{AB}}{d_p}, \quad (8)$$

where  $D_{AB}$  is the diffusion coefficient of glycerol into water at 513 K ( $1.63 \cdot 10^{-4} \text{ cm}^2 \cdot \text{s}^{-1}$ ),  $d_p$  is the catalyst particle diameter,  $Sh$  is the Sherwood number, which is calculated as:

$$Sh = 2 + 0.6 \cdot Re^{0.5} \cdot Sc^{1/3}, \quad (9)$$

where  $Sc$  is the Schmidt number,  $Re$  is the Reynolds number.

The Schmidt number is found as follows:

$$Sc = \frac{V}{D_{AB}}, \quad (10)$$

where  $V$  is the kinetic viscosity of water at 513K ( $1.36 \cdot 10^{-3} \text{ cm}^2 \cdot \text{s}^{-1}$ ).

$$Sc = \frac{1.36 \cdot 10^{-3}}{1.63 \cdot 10^{-4}} = 8.34. \quad (11)$$

The impeller Reynolds number is calculated as:

$$Re = \frac{N \cdot D^2 \cdot \rho}{\mu}, \quad (12)$$

where  $N$  is the rotational speed of the impeller ( $1000/60 = 16.67 \text{ s}^{-1}$ ),  $D$  is the impeller diameter ( $3.5 \cdot 10^{-3} \text{ m}$ ),  $\rho$  is the density of water at 513 K ( $813 \text{ kg} \cdot \text{m}^{-3}$ ),  $\mu$  is the dynamic viscosity of water at 513 K ( $1.11 \cdot 10^{-4} \text{ kg} \cdot \text{s}^{-1} \cdot \text{m}^{-1}$ ).

$$Re = \frac{N \cdot D^2 \cdot \rho}{\mu} = \frac{16.67 \cdot (3.5 \cdot 10^{-3})^2 \cdot 813}{1.11 \cdot 10^{-4}} = 1509. \quad (13)$$

$$Sh = 2 + 0.6 \cdot Re^{0.5} \cdot Sc^{1/3} = 2 + 0.6 \cdot 1509^{0.5} \cdot (8.34)^{1/3} = 49.27 \quad (14)$$

$$k_c = \frac{Sh \cdot D_{AB}}{d_p} = \frac{49.27 \cdot 1.63 \cdot 10^{-4}}{10^{-4}} = 80.2 \quad (15)$$

$$C_{mears} = \frac{-r'_{gly} \cdot \rho_b \cdot R \cdot n}{k_c \cdot C_{AS}} = \frac{3.89 \cdot 10^{-4} \cdot 0.35 \cdot 1.5 \cdot 10^{-5} \cdot 2}{80.2 \cdot 1.1 \cdot 10^{-3}} = 4.63 \cdot 10^{-8} \ll 0.15 \quad (16)$$

The  $C_{mears}$  value of glycerol to water is equal to  $4.63 \cdot 10^{-8} \ll 0.15$  on substitution of the above values and from this we can infer that external diffusion is negligible in the above reaction.

## 4. Error Analysis

### 4.1. Experimental Error

Experiments in tandem catalysis glycerol conversion were repeated, and values of substrate/product concentration were calculated (Tables S5 and S6), the error of which was taken into account when parameter estimation was carried out.

**Table S5.** Results of repeated experiments with NaOH.

| T (K) | Time (min) | $C_{GLY}$ | $C_{DG}$ | $C_{LA}$ | $C_{PG}$ | $C_{AA}$ | $C_{HO^-}$ |
|-------|------------|-----------|----------|----------|----------|----------|------------|
| 513   | 60         | 1.189     | 0.012    | 0.046    | 0.003    | 0.001    | 0.964      |
| 513   | 60         | 1.228     | 0.008    | 0.033    | 0.002    | 0.000    | 0.986      |
| 513   | 120        | 1.143     | 0.013    | 0.058    | 0.004    | 0.003    | 0.949      |
| 513   | 120        | 1.192     | 0.011    | 0.043    | 0.005    | 0.002    | 0.966      |
| 513   | 180        | 1.098     | 0.017    | 0.070    | 0.006    | 0.003    | 0.937      |
| 513   | 180        | 1.154     | 0.014    | 0.058    | 0.007    | 0.003    | 0.950      |
| 513   | 240        | 1.045     | 0.018    | 0.082    | 0.008    | 0.006    | 0.922      |
| 513   | 240        | 1.126     | 0.018    | 0.070    | 0.009    | 0.004    | 0.936      |
| 513   | 300        | 0.998     | 0.023    | 0.114    | 0.009    | 0.008    | 0.887      |
| 513   | 300        | 1.098     | 0.019    | 0.087    | 0.010    | 0.006    | 0.917      |
| 513   | 360        | 0.962     | 0.026    | 0.115    | 0.013    | 0.010    | 0.884      |
| 513   | 360        | 1.080     | 0.022    | 0.096    | 0.012    | 0.008    | 0.906      |
| 513   | 420        | 0.934     | 0.027    | 0.136    | 0.014    | 0.013    | 0.860      |
| 513   | 420        | 1.063     | 0.025    | 0.111    | 0.014    | 0.011    | 0.885      |

**Table S6.** Results of repeated experiments with Cu NPs catalyst in the base media.

| T, K | Time (min) | $C_{GLY}$ | $C_{DG}$ | $C_{LA}$ | $C_{PG}$ | $C_{AA}$ | $C_{HO^-}$ |
|------|------------|-----------|----------|----------|----------|----------|------------|
| 513  | 20         | 0.632     | 0.025    | 0.039    | 0.048    | 0.011    | 0.612      |
| 513  | 20         | 0.691     | 0.016    | 0.340    | 0.049    | 0.015    | 0.654      |
| 513  | 40         | 0.513     | 0.026    | 0.478    | 0.056    | 0.014    | 0.518      |
| 513  | 40         | 0.532     | 0.015    | 0.453    | 0.059    | 0.023    | 0.534      |
| 513  | 60         | 0.416     | 0.029    | 0.549    | 0.062    | 0.017    | 0.443      |
| 513  | 60         | 0.472     | 0.017    | 0.571    | 0.064    | 0.013    | 0.426      |
| 513  | 120        | 0.303     | 0.032    | 0.615    | 0.065    | 0.022    | 0.373      |
| 513  | 120        | 0.348     | 0.021    | 0.620    | 0.067    | 0.034    | 0.356      |
| 513  | 180        | 0.232     | 0.035    | 0.672    | 0.067    | 0.026    | 0.313      |
| 513  | 180        | 0.246     | 0.023    | 0.649    | 0.081    | 0.053    | 0.308      |
| 513  | 240        | 0.171     | 0.035    | 0.698    | 0.065    | 0.035    | 0.281      |
| 513  | 240        | 0.183     | 0.024    | 0.660    | 0.084    | 0.072    | 0.278      |
| 513  | 300        | 0.145     | 0.036    | 0.712    | 0.063    | 0.032    | 0.266      |
| 513  | 300        | 0.156     | 0.025    | 0.673    | 0.091    | 0.056    | 0.243      |
| 513  | 360        | 0.118     | 0.037    | 0.717    | 0.062    | 0.042    | 0.259      |
| 513  | 360        | 0.119     | 0.026    | 0.698    | 0.081    | 0.054    | 0.189      |
| 513  | 420        | 0.096     | 0.034    | 0.721    | 0.060    | 0.065    | 0.256      |
| 513  | 420        | 0.106     | 0.025    | 0.711    | 0.091    | 0.074    | 0.188      |

#### 4.2. Measuring Error

The maximum error for HPLC analysis (repeated injection of one sample) is less than 0.1 %, which is much lower compared with experimental error (approximately 2–15%).

#### 4.3 Error Analysis of Reaction Parameters-Weighted Least Squares

The goal of using weighted least squares is to ensure that each data point has an appropriate level of influence on the final parameter estimation. However, it is difficult to evaluate the appropriate level of each component (*e.g.*, GLY, LA, *etc.*), therefore the weight factor for each species and replicates (repeated experimental results) were considered is 1.0 during estimation of reaction parameters.

### 5. Analysis of Cu NPs Catalyst

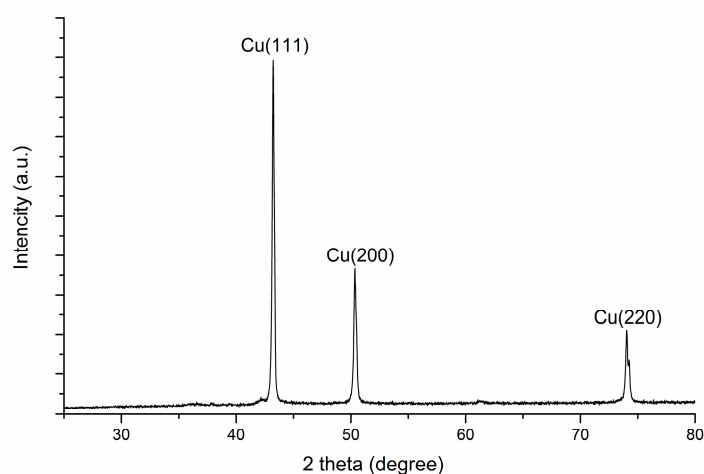

Figure S1. XRD patterns of Cu NPs catalyst.

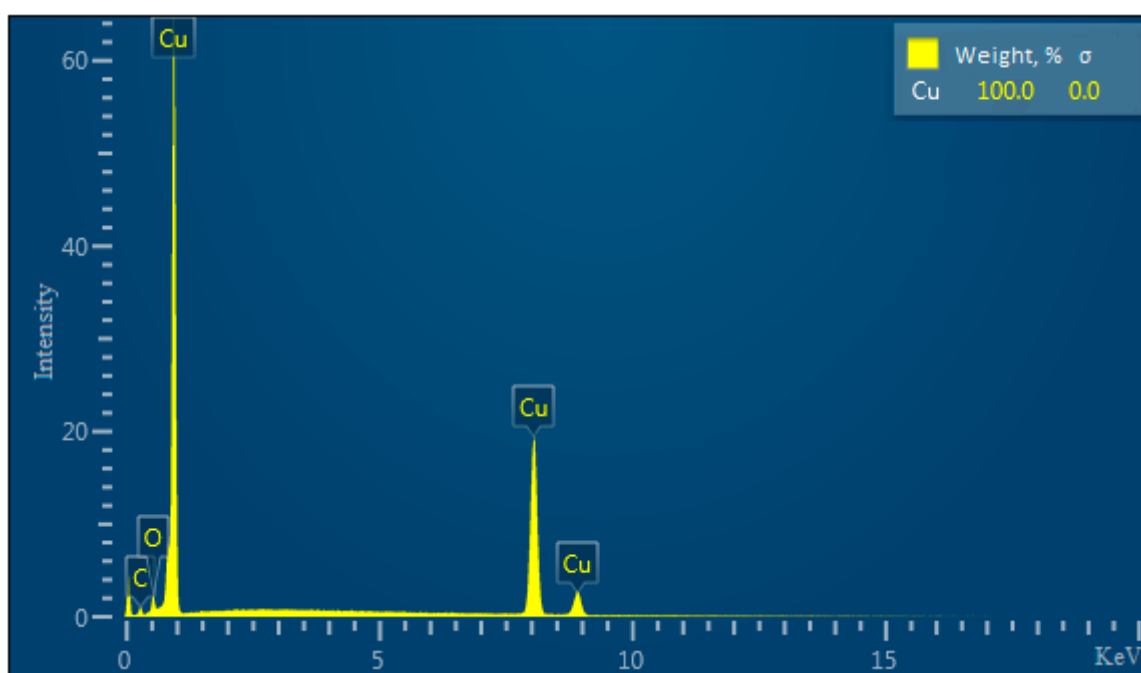

Figure S2. EDS of Cu NPs catalyst.

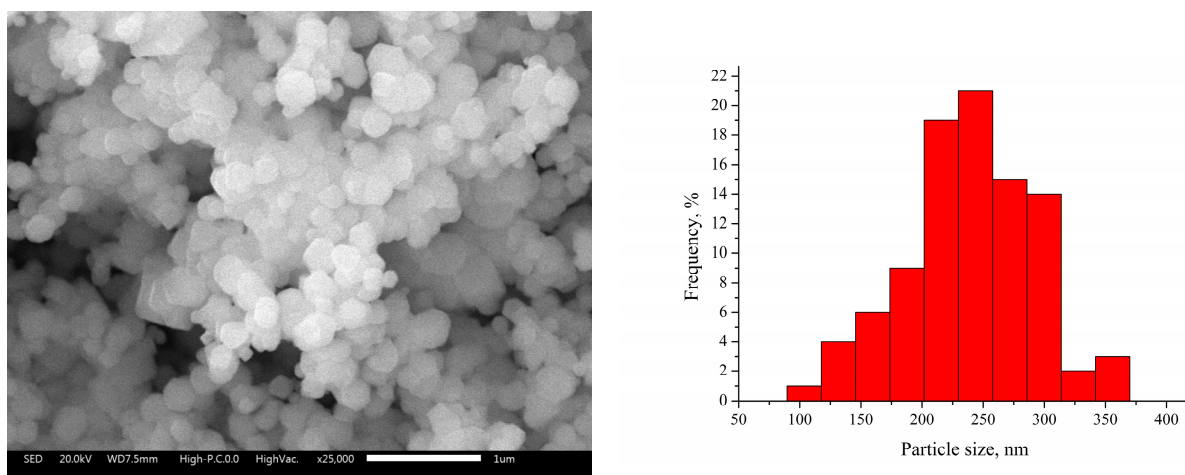

Figure S3. SEM image and particle size distribution of Cu NPs catalyst.

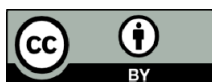

© 2019 by the authors. Submitted for possible open access publication under the terms and conditions of the Creative Commons Attribution (CC BY) license (<http://creativecommons.org/licenses/by/4.0/>).
